# Supplementary material for: Antonii de Curtis qui est "Toto" carmen
Source: Royal Society of Chemistry journal article supplement (doi:10.1039/c0lc00356e), 2002-01-01
Supplement: c0lc00356e.pdf [file c0lc00356e.pdf]

**NEW FAMILY OF FLUORINATED POLYMER CHIPS  
FOR DROPLET AND ORGANIC SOLVENT  
MICROFLUIDICS**

Stefano Begolo, Guillaume Colas,  
Jean-Louis Viovy and Laurent Malaquin

**Swelling ratios of THV500 in representative organic solvents.**

| Solvent    | Swelling Ratio for THV500 <sup>a</sup> | Swelling Ratio for PDMS <sup>b</sup> |
|------------|----------------------------------------|--------------------------------------|
| water      | 1.00                                   | 1.00                                 |
| ethanol    | 1.00                                   | 1.04                                 |
| toluene    | 1.00                                   | 1.31                                 |
| hexadecane | 1.00                                   | ~1.3 <sup>c</sup>                    |
| chloroform | 1.01                                   | 1.39                                 |
| FC-40      | 1.00                                   | 1.00                                 |

Each measure was obtained by cutting a 2x2x3mm block of THV500. The block was then put for 24 hours in a flask containing the solvent to be studied. Measures of the block were taken before ( $D_0$ ) and after ( $D$ ) the contact with the solvent using a caliper (accuracy 0.01mm). The second measure was performed while the block was inside the solvent, in order to avoid errors due to evaporation. The Swelling ratio ( $S$ ) was calculated using the formula proposed by Lee *et al.* (2003):

$$S = \frac{D}{D_0} \quad (1)$$

and averaging three measures for each solvent.

## References

J. N. Lee, C. Park and G. M. Whitesides, *Analytical Chemistry*, 2003, **75**, 6544–6554.

---

<sup>a</sup>Mean value of the swelling ratios calculated for 3 samples

<sup>b</sup>As reported by Lee *et al.* (2003)

<sup>c</sup>Data not available. This value corresponds the order of magnitude of swelling ratio for PDMS in alkanes
